# Supplementary material
Source: publisher site journal article supplement (https://www.dovepress.com/get_supplementary_file.php?f=468251.xlsx)
Supplement: Supplementary file 1 [file get_supplementary_file.php]

## Sheet: 1
										Table S1 Full details of the study population
Gender	Age	Liver background	Location	Number	Abscess size(cm)	Structure of the abscess	Septations within the abscess	Internal gas bubble	Echogenic debris	Variable calcification	Blood flow signals	Margin of lesion	Abscess wall thickening	Whether the inner wall is worm-eaten	Pathogenic bacteria	Temperature(℃)	Duration of fever(d)	Diabetes mellitus	Biliary tract disease	Hepatobiliary surgery	NEUT	CRP	PCT
male	30	fatty liver	left	single	8.2	Solid dominance	multilocular	none	none	yes	yes	Smooth	Thick wall	yes	Staphylococcus	39.8	7	no	no	no	9.6	383.4	103
male	58	fibrosis	right	single	6	Cystic dominance	unilocular	yes	yes	none	yes	Irregular or indistinct	Immural	yes	Staphylococcus	38.5	4	no	yes	yes	4.82	127.14	1.91
male	58	fibrosis	right	single	4.5	Solid dominance	unilocular	none	none	yes	none	Smooth	Thin wall	none	Staphylococcus	38.5	4	no	yes	yes	4.82	127.14	1.91
male	58	fibrosis	right	single	2.9	Cystic	unilocular	none	none	none	none	Smooth	Thin wall	none	Staphylococcus	38.5	4	no	yes	yes	5.15	2222.71	9.56465
male	36	fatty liver	both	three or more	10.5	Miscibility	multilocular	none	none	yes	yes	Irregular or indistinct	Thick wall	yes	Staphylococcus	39	30	no	no	no	24.71	231.7	19.7
male	61	fibrosis	right	single	12.1	Miscibility	multilocular	none	none	yes	yes	Irregular or indistinct	Thick wall	yes	Staphylococcus	40	17	no	no	no	8.5	75.9	0.364
male	64	fatty liver	right	single	8	Cystic dominance	unilocular	none	none	none	yes	Smooth	Thick wall	none	Staphylococcus	38.8	30	no	no	no	5.31	59.2861	0.469104
male	73	fatty liver	both	single	4.8	Cystic dominance	unilocular	none	none	none	none	Smooth	Thick wall	none	Staphylococcus	42	20	yes	no	no	3.26	2.88	0.06
female	54	fibrosis	right	single	10.1	Cystic dominance	unilocular	none	none	none	none	Smooth	Thick wall	none	Staphylococcus	39	5	yes	no	no	5.11	242.5	0.28
female	61	fatty liver	left	single	8.1	Cystic dominance	unilocular	none	yes	none	yes	Smooth	Thick wall	yes	Staphylococcus	38	4	no	no	no	9	141.762	6.14176
male	37	fibrosis	right	single	4.9	Miscibility	unilocular	none	yes	none	none	Smooth	Thick wall	yes	Staphylococcus	40	10	no	no	no	6.76	73.0748	0.212
male	53	fatty liver	both	three or more	3.2	Solid	none	none	none	none	yes	Smooth	Immural	none	Klebsiella pneumonia	39.482	27.34	no	yes	no	6.58	253.5	1.16
male	54	fibrosis	right	single	2.4	Cystic dominance	unilocular	none	none	none	none	Smooth	Thick wall	none	Staphylococcus	39.342	23.375	yes	no	yes	5.19	68.7	0.186
male	72	fatty liver	right	single	7.1	Cystic	unilocular	none	none	yes	none	Smooth	Thick wall	none	Klebsiella pneumonia	40	10	yes	no	no	2.65	2.42	0.119
male	72	fatty liver	right	single	10.3	Solid dominance	unilocular	yes	none	yes	none	Smooth	Thick wall	yes	Klebsiella pneumonia	40	10	yes	no	no	2.65	2.42	0.119
male	71	fibrosis	both	three or more	3.5	Solid	none	none	none	none	yes	Smooth	Immural	none	Klebsiella pneumonia	39.735	63	no	no	yes	5.37	24.5	0.125
female	57	fatty liver	right	single	15.6	Miscibility	multilocular	none	yes	yes	yes	Irregular or indistinct	Thick wall	yes	Klebsiella pneumonia	39.105	52.75	no	yes	yes	15.25	90.34	3.2
female	70	fibrosis	right	three or more	11.5	Cystic dominance	unilocular	yes	none	none	none	Smooth	Thick wall	yes	Klebsiella pneumonia	39.114	34.84	no	yes	no	9.17	70.7	2.24
male	39	fibrosis	both	three or more	5.4	Miscibility	unilocular	none	none	none	yes	Irregular or indistinct	Thick wall	yes	Klebsiella pneumonia	39	30	no	yes	no	7.09	93.5	1.29
female	66	fibrosis	right	single	5.2	Miscibility	unilocular	none	none	none	none	Smooth	Thin wall	none	Klebsiella pneumonia	39.147	32.245	no	no	no	26.57	81.1	0.983
male	51	fibrosis	right	single	2.8	Cystic	unilocular	yes	none	none	none	Smooth	Thick wall	none	Klebsiella pneumonia	39.256	3	yes	no	yes	11.69	84.36	0.17
male	58	fatty liver	both	three or more	5.5	Cystic dominance	unilocular	none	none	none	none	Irregular or indistinct	Thick wall	none	Klebsiella pneumonia	40	60	no	yes	no	8.51	184.7	1.83
female	72	fatty liver	right	single	8	Miscibility	multilocular	none	yes	yes	none	Irregular or indistinct	Thick wall	yes	Klebsiella pneumonia	39.3	15	no	no	no	9.88	64.1	51.94
male	73	fibrosis	right	single	7.1	Cystic dominance	unilocular	none	none	none	none	Smooth	Thick wall	none	Klebsiella pneumonia	39.163	180	yes	yes	no	7.47	620.789	7.68765
male	68	fatty liver	right	single	3.3	Solid dominance	unilocular	none	none	none	yes	Smooth	Thin wall	none	Klebsiella pneumonia	38.5	21	no	no	no	1.97	1156.01	10.7212
male	56	fibrosis	right	single	6.9	Miscibility	unilocular	none	none	none	none	Smooth	Thin wall	none	Klebsiella pneumonia	39.4452	23.955	no	no	yes	4.94	81.4618	2.11692
male	53	fatty liver	right	single	7.1	Miscibility	unilocular	none	none	yes	yes	Smooth	Thin wall	none	Klebsiella pneumonia	41	20	yes	no	no	2.62	157.88	0.195
female	62	fatty liver	both	three or more	13.8	Solid dominance	multilocular	none	none	none	none	Smooth	Thick wall	yes	Klebsiella pneumonia	39.5	14	yes	no	no	25.87	105.38	0.873
male	67	fatty liver	both	three or more	9.9	Cystic dominance	multilocular	none	none	none	yes	Smooth	Thick wall	yes	Klebsiella pneumonia	39.5	4	no	yes	yes	7.46	131.07	29.49
male	54	fatty liver	left	single	3.9	Solid	none	none	none	yes	yes	Smooth	Immural	none	Staphylococcus	39.5	240	no	yes	no	3.78	44.7	0.16
female	63	fibrosis	right	single	6.4	Solid dominance	unilocular	none	none	none	none	Irregular or indistinct	Thick wall	yes	Staphylococcus	41	91	no	yes	yes	3.51	2174.59	0.412
male	55	fatty liver	right	single	10	Solid dominance	unilocular	none	none	none	none	Irregular or indistinct	Thick wall	yes	Klebsiella pneumonia	39.6	7	no	no	no	11.84	108.1	0.499
male	56	fatty liver	right	single	6.8	Cystic	multilocular	none	yes	none	none	Smooth	Thick wall	yes	Klebsiella pneumonia	38.7	9	yes	no	no	2.24	2.1	0.08
female	50	fatty liver	right	single	5	Miscibility	multilocular	none	none	none	none	Irregular or indistinct	Thick wall	yes	Klebsiella pneumonia	39.6	12	yes	no	no	5.35	77.17	0.59
male	27	fatty liver	left	single	8.8	Cystic dominance	multilocular	none	none	none	yes	Smooth	Thick wall	yes	Klebsiella pneumonia	40	20	yes	no	no	5.36	13.6	0.07
female	60	fibrosis	both	three or more	15	Miscibility	multilocular	yes	none	none	yes	Irregular or indistinct	Thick wall	yes	Klebsiella pneumonia	39	21	yes	no	no	10.48	172.65	8.89
male	67	fibrosis	right	single	8.5	Cystic	unilocular	none	yes	yes	none	Smooth	Thick wall	none	Klebsiella pneumonia	41	30	yes	yes	yes	6.37	615.889	7.39252
male	55	fibrosis	right	single	6.1	Cystic	unilocular	none	none	none	yes	Smooth	Thick wall	yes	Klebsiella pneumonia	39.329	21	no	no	no	6.54	79.8502	0.81
male	70	fatty liver	right	single	5.6	Cystic	unilocular	yes	none	none	none	Smooth	Thick wall	none	Klebsiella pneumonia	38.8	23	yes	no	no	4.46	39.563	0.09
male	64	fibrosis	right	single	8.3	Miscibility	multilocular	yes	yes	yes	yes	Smooth	Thin wall	yes	Klebsiella pneumonia	39.5	57	yes	no	no	5.51	44.97	0.06
male	78	fibrosis	both	three or more	5.8	Cystic dominance	multilocular	yes	none	none	yes	Irregular or indistinct	Thick wall	yes	Klebsiella pneumonia	39.8	15	yes	yes	no	5.51	28.57	0.099
male	49	fibrosis	right	single	6.5	Miscibility	multilocular	none	yes	none	yes	Irregular or indistinct	Thick wall	yes	Klebsiella pneumonia	39.5	10	no	no	no	6.85	21.48	0.132
male	49	fibrosis	right	single	3.6	Solid dominance	unilocular	none	none	none	none	Smooth	Thick wall	none	Klebsiella pneumonia	39.5	10	no	no	no	1.87	0.5	0.06
male	37	fibrosis	right	single	4.5	Miscibility	multilocular	none	yes	none	yes	Smooth	Thin wall	none	Klebsiella pneumonia	39	9	yes	no	no	4	43.2	0.341
male	47	fibrosis	right	single	11.8	Miscibility	multilocular	none	none	none	yes	Irregular or indistinct	Thick wall	yes	Klebsiella pneumonia	38.5	5	yes	no	no	16.79	200.2	2.68
male	49	fatty liver	left	three or more	6.3	Cystic dominance	multilocular	none	none	none	yes	Smooth	Thick wall	yes	Klebsiella pneumonia	39	28	yes	no	no	8.91	166.1	1.47
female	53	fatty liver	both	three or more	9.6	Cystic dominance	unilocular	none	yes	none	none	Irregular or indistinct	Thick wall	yes	Klebsiella pneumonia	39.235	10	yes	no	no	6.6	125.99	0.15
female	72	fibrosis	left	single	7.1	Miscibility	multilocular	none	none	none	none	Smooth	Thick wall	yes	Klebsiella pneumonia	39.364	39.22	yes	yes	no	2.38	49.45	0.14
female	46	fatty liver	both	three or more	7.5	Miscibility	multilocular	none	none	none	yes	Irregular or indistinct	Thick wall	yes	Klebsiella pneumonia	39.5955	10	no	no	no	10.06	110.1	0.15
female	66	fatty liver	both	single	8.8	Miscibility	multilocular	none	none	yes	yes	Irregular or indistinct	Thick wall	yes	Klebsiella pneumonia	39.455	13	no	no	no	5.43	82.1787	2.42634
female	57	fatty liver	right	single	16.4	Cystic dominance	multilocular	none	none	yes	yes	Smooth	Thick wall	yes	Klebsiella pneumonia	39.5	25	yes	no	no	4.8	56.24	0.27
male	59	fibrosis	both	three or more	5.9	Miscibility	multilocular	none	none	none	yes	Smooth	Thick wall	none	Klebsiella pneumonia	42	9	no	yes	no	9.77	71.5	0.602
male	51	fibrosis	both	single	9.7	Cystic dominance	multilocular	none	none	yes	yes	Irregular or indistinct	Thick wall	yes	Klebsiella pneumonia	39	20	yes	no	no	5.31	19.3	0.12
female	61	fatty liver	right	single	5.2	Miscibility	unilocular	yes	none	yes	yes	Smooth	Thick wall	yes	Klebsiella pneumonia	41	15	yes	no	no	5.86	97.2013	0.6
male	65	fatty liver	both	three or more	10.2	Solid dominance	unilocular	none	none	yes	none	Irregular or indistinct	Thick wall	yes	Klebsiella pneumonia	39.5	30	yes	yes	yes	9.16	112.75	68.88
female	64	fatty liver	both	three or more	11.2	Cystic dominance	multilocular	yes	yes	none	yes	Irregular or indistinct	Thick wall	yes	Klebsiella pneumonia	39	20	no	no	no	5.46	100.7	1.1832
female	64	fatty liver	right	three or more	3.5	Cystic dominance	unilocular	none	none	yes	none	Irregular or indistinct	Thick wall	none	Klebsiella pneumonia	39	20	no	no	no	3.98	602.98	1.58965
male	51	fatty liver	left	single	7.7	Miscibility	unilocular	none	none	none	yes	Irregular or indistinct	Thick wall	yes	Klebsiella pneumonia	40	10	no	no	no	11.96	120.558	4.9955
female	67	fibrosis	right	single	8.4	Solid dominance	unilocular	none	yes	none	yes	Smooth	Thin wall	none	Klebsiella pneumonia	39	3	yes	yes	no	6.85	307.3	12.26
female	67	fibrosis	right	single	2.7	Solid	none	none	none	yes	none	Smooth	Thin wall	none	Klebsiella pneumonia	39	3	yes	yes	no	2.98	59.4075	1.20225
female	26	fatty liver	both	three or more	13	Miscibility	multilocular	none	none	yes	yes	Irregular or indistinct	Thick wall	yes	Klebsiella pneumonia	39.4	12	yes	no	no	11.89	434	0.47
female	54	fibrosis	both	three or more	10.9	Miscibility	unilocular	none	none	yes	yes	Smooth	Thick wall	yes	Klebsiella pneumonia	38	7	yes	no	no	8.1	186	1.51
male	37	fatty liver	right	single	4	Solid dominance	unilocular	none	none	none	yes	Smooth	Thick wall	yes	Klebsiella pneumonia	39.2	30	no	yes	no	4.4	113.9	3.86
male	49	fibrosis	right	single	6.4	Cystic dominance	unilocular	yes	yes	yes	none	Smooth	Thick wall	yes	Klebsiella pneumonia	39.5	7	no	no	no	8.91	1160.73	2.63054
male	69	fatty liver	right	two	8.9	Miscibility	unilocular	none	none	yes	yes	Irregular or indistinct	Thick wall	yes	Klebsiella pneumonia	39	6	no	no	no	10.55	226.4	3.9
male	60	fatty liver	right	single	8.2	Miscibility	unilocular	none	yes	none	yes	Smooth	Thick wall	yes	Klebsiella pneumonia	39	4	yes	no	no	6.92	107.44	0.94
male	60	fatty liver	right	single	7	Solid dominance	unilocular	none	none	none	yes	Smooth	Thick wall	yes	Klebsiella pneumonia	39	4	yes	no	no	2.36	33.66	0.13
female	51	fibrosis	right	three or more	3.8	Cystic	unilocular	none	none	none	none	Smooth	Thin wall	none	Klebsiella pneumonia	40.2	6	no	yes	no	5.34	3	0.01
male	56	fatty liver	right	single	5.8	Cystic dominance	multilocular	yes	yes	none	none	Irregular or indistinct	Thick wall	yes	Klebsiella pneumonia	42	5	yes	no	no	8.28	233.9	1.05
male	65	fatty liver	left	single	9.6	Cystic dominance	unilocular	none	none	none	yes	Smooth	Thick wall	none	Klebsiella pneumonia	38	30	yes	no	no	6.33	93.56	0.242
male	45	fatty liver	right	single	3.7	Solid	none	none	none	none	none	Smooth	Immural	none	Klebsiella pneumonia	39	17	yes	no	no	1.99	9.93	0.07938
male	40	fatty liver	right	single	2.5	Cystic dominance	multilocular	none	yes	none	yes	Irregular or indistinct	Thick wall	yes	Klebsiella pneumonia	38.8	7	no	no	no	11.62	274.68	49.09
male	57	fatty liver	both	three or more	5.5	Miscibility	multilocular	none	none	none	none	Smooth	Thick wall	yes	Klebsiella pneumonia	39.372	7	no	no	no	13.06	148.123	4.23399
male	33	fatty liver	right	single	6.2	Cystic dominance	unilocular	none	none	none	none	Smooth	Thin wall	none	Klebsiella pneumonia	40	15	no	no	no	9.76	57	0.29
male	33	fatty liver	right	single	4.6	Solid	none	none	none	none	none	Smooth	Thin wall	none	Klebsiella pneumonia	40	15	no	no	no	8.07	57	0.29
male	69	fatty liver	right	single	5.6	Cystic dominance	unilocular	none	none	yes	yes	Smooth	Thick wall	yes	Klebsiella pneumonia	39	15	no	no	no	4.67	77.2	0.383
male	69	fatty liver	right	single	2.5	Solid	none	none	none	none	none	Smooth	Thin wall	none	Klebsiella pneumonia	39	15	no	no	no	3.84	46.2976	1.45368
male	42	fatty liver	right	single	10.8	Solid dominance	unilocular	none	none	none	yes	Irregular or indistinct	Thick wall	yes	Klebsiella pneumonia	39.5	5	no	no	no	13.69	149.3	3.26
female	66	fibrosis	both	three or more	2	Cystic dominance	unilocular	none	none	none	none	Smooth	Thick wall	yes	Klebsiella pneumonia	39	2	no	no	no	12.1	1214.56	3.74037
female	66	fibrosis	both	three or more	4.2	Solid dominance	multilocular	none	none	none	yes	Smooth	Thick wall	yes	Klebsiella pneumonia	39	2	no	no	no	6.44	125.1	2.67
female	66	fibrosis	right	three or more	6.2	Cystic dominance	unilocular	none	none	yes	none	Smooth	Thick wall	yes	Klebsiella pneumonia	39	2	no	no	no	7.84	126	0.581
female	75	fatty liver	left	single	4.2	Solid dominance	unilocular	none	none	yes	none	Smooth	Immural	none	Klebsiella pneumonia	39.4	15	yes	no	no	2.77	4.4	0.036
female	60	fibrosis	both	three or more	6.3	Cystic dominance	unilocular	none	yes	yes	yes	Smooth	Thick wall	yes	Klebsiella pneumonia	39.306	41.71	no	no	no	0.67	15.6	0.03
male	50	fatty liver	right	two	3.4	Miscibility	unilocular	none	none	yes	none	Irregular or indistinct	Thick wall	yes	Klebsiella pneumonia	39	365	no	no	no	7.29	4351.96	2.7
male	60	fatty liver	right	single	6.5	Cystic dominance	multilocular	none	none	none	yes	Irregular or indistinct	Thick wall	yes	Klebsiella pneumonia	38.1	10	no	no	no	10.5	84.5	1.4
female	60	fatty liver	both	single	11.9	Cystic dominance	unilocular	none	yes	yes	yes	Irregular or indistinct	Thick wall	yes	Klebsiella pneumonia	39.257	21.725	no	no	no	5.08	80.0021	0.66067
male	72	fibrosis	right	single	7.6	Solid dominance	multilocular	none	yes	none	yes	Smooth	Thick wall	none	Klebsiella pneumonia	39.6	32.12	yes	no	yes	3	65.54	0.12
female	63	fibrosis	right	single	7.5	Miscibility	multilocular	none	yes	none	yes	Irregular or indistinct	Thick wall	yes	Klebsiella pneumonia	40	10	yes	no	no	4.92	39.9	0.26
female	68	fatty liver	right	single	8.9	Cystic dominance	multilocular	none	yes	none	yes	Smooth	Thick wall	yes	Klebsiella pneumonia	38.5	15	no	no	no	8.44	91.3102	0.08
female	54	fibrosis	left	single	4.5	Solid	none	none	none	yes	none	Irregular or indistinct	Immural	none	Klebsiella pneumonia	39	11	no	no	no	9.92	87.96	0.179
male	81	fibrosis	right	single	8.1	Miscibility	unilocular	none	yes	yes	none	Smooth	Thick wall	yes	Klebsiella pneumonia	37.8	4	yes	no	no	7.48	96.76	19.26
male	64	fibrosis	right	single	2.4	Solid	none	none	none	none	none	Smooth	Thin wall	none	Klebsiella pneumonia	38.8	7	yes	no	no	3.9	1.68	0.04
male	44	fibrosis	right	single	10.9	Miscibility	multilocular	none	yes	yes	yes	Irregular or indistinct	Thick wall	yes	Klebsiella pneumonia	39.223	3	yes	yes	no	7.95	112.342	0.14
male	44	fibrosis	right	single	2.6	Solid	none	none	none	none	none	Irregular or indistinct	Immural	none	Klebsiella pneumonia	39.517	60	yes	yes	no	2.8	18.71	0.444
female	73	fibrosis	both	three or more	12.4	Cystic dominance	multilocular	none	yes	none	yes	Smooth	Thick wall	none	Klebsiella pneumonia	39.233	5	yes	no	no	4.89	158.7	0.62
male	50	fatty liver	right	single	6.2	Miscibility	multilocular	none	none	none	yes	Irregular or indistinct	Thick wall	yes	Klebsiella pneumonia	39.4	26	no	no	no	6.53	207.1	1.99
male	50	fatty liver	right	single	3.2	Solid	none	none	none	yes	none	Irregular or indistinct	Immural	none	Klebsiella pneumonia	39.4	26	no	no	no	2.14	2.1	0.054
female	41	fibrosis	both	single	2.2	Solid dominance	unilocular	none	none	none	none	Irregular or indistinct	Immural	none	Klebsiella pneumonia	39.6	30	yes	no	no	3.46	570.132	4.93921
male	69	fibrosis	right	single	10.2	Solid dominance	unilocular	yes	none	none	yes	Irregular or indistinct	Thick wall	none	Klebsiella pneumonia	39.5	14	yes	no	yes	3.11	5.1	0.11
male	66	fatty liver	right	single	9.5	Miscibility	multilocular	none	none	none	yes	Smooth	Thick wall	yes	Klebsiella pneumonia	39	5	yes	no	no	2.85	614.252	0.06
male	55	fatty liver	right	single	11.6	Miscibility	unilocular	none	none	none	yes	Irregular or indistinct	Thick wall	none	Klebsiella pneumonia	39	10	no	no	no	6.78	132.19	4.55
male	43	fibrosis	both	three or more	3.9	Solid	none	none	none	none	yes	Irregular or indistinct	Immural	none	Klebsiella pneumonia	38.6	58	no	no	no	4.54	2232.01	10.9957
male	51	fibrosis	both	two	8.33	Solid dominance	unilocular	none	none	none	none	Smooth	Immural	none	Klebsiella pneumonia	40	30	no	no	yes	5.86	98.58	0.276
male	68	fatty liver	right	single	9.5	Cystic dominance	unilocular	none	yes	none	yes	Smooth	Thin wall	none	Klebsiella pneumonia	39.348	18.385	no	no	no	13.1	59.15	0.274
female	58	fatty liver	right	two	7.4	Miscibility	unilocular	none	none	none	none	Irregular or indistinct	Thick wall	none	Klebsiella pneumonia	39	12	no	no	no	6.79	109.862	0.507914
female	65	fatty liver	left	single	8.8	Solid dominance	multilocular	none	none	none	yes	Irregular or indistinct	Thick wall	yes	Klebsiella pneumonia	38.5	9	no	no	no	8.99	111.691	2.22846
female	65	fatty liver	left	single	4.6	Solid	none	none	none	yes	none	Smooth	Immural	none	Klebsiella pneumonia	38.5	9	no	no	no	6.888	113.74	1.20443
male	72	fibrosis	right	single	13	Solid dominance	unilocular	yes	none	yes	yes	Irregular or indistinct	Thick wall	none	Klebsiella pneumonia	38	10	yes	no	no	20.85	145.024	12.2494
female	76	fatty liver	right	single	5.4	Miscibility	unilocular	none	none	yes	yes	Smooth	Thick wall	none	Klebsiella pneumonia	40	7	yes	no	no	19.76	323.8	1.21
female	59	fatty liver	right	single	2.4	Solid dominance	unilocular	none	none	yes	none	Irregular or indistinct	Immural	none	Klebsiella pneumonia	41	10	no	no	no	4.51	77.4518	2.63849
female	49	fatty liver	right	single	9.2	Solid dominance	multilocular	none	yes	none	yes	Smooth	Thick wall	none	Klebsiella pneumonia	40.2	10	yes	no	no	12.91	163.68	1.55
male	78	fibrosis	right	single	7	Miscibility	multilocular	none	none	none	none	Irregular or indistinct	Thick wall	yes	Klebsiella pneumonia	39	7	yes	no	no	6.53	101.8	6.29
female	69	fibrosis	right	single	9	Solid dominance	unilocular	yes	none	yes	yes	Irregular or indistinct	Immural	none	Klebsiella pneumonia	39.8	60	yes	no	no	4.85	44.88	0.163
male	41	fatty liver	right	single	7.3	Miscibility	unilocular	none	none	yes	yes	Smooth	Thick wall	none	Klebsiella pneumonia	41	8	no	no	no	7.592	59.04	1.57
male	21	fatty liver	right	single	6	Solid	none	none	none	none	yes	Irregular or indistinct	Immural	none	Klebsiella pneumonia	38.8	7	yes	no	no	10.57	155.62	9.19021
male	21	fatty liver	right	single	8.6	Miscibility	multilocular	none	none	yes	none	Irregular or indistinct	Thick wall	none	Klebsiella pneumonia	38.8	7	yes	no	no	6.26	118.033	11.6086
male	21	fatty liver	right	single	5.6	Solid dominance	multilocular	none	none	yes	none	Smooth	Thick wall	none	Klebsiella pneumonia	38.8	7	yes	no	no	4.93	99.9922	8.44851
male	45	fatty liver	left	single	9.5	Cystic dominance	multilocular	none	none	none	yes	Smooth	Thick wall	yes	Klebsiella pneumonia	40	10	yes	no	no	5.08	54.5	1.31
male	67	fatty liver	right	single	2.5	Cystic dominance	unilocular	none	none	none	yes	Smooth	Thick wall	none	Klebsiella pneumonia	40	10	yes	no	no	3.7	34.7	17.27
female	68	fibrosis	left	single	5.7	Cystic dominance	multilocular	none	none	none	yes	Irregular or indistinct	Thick wall	yes	Klebsiella pneumonia	38.5	10	yes	no	no	7.5	127.4	29.22
male	57	fatty liver	both	three or more	5.3	Cystic dominance	unilocular	none	none	yes	yes	Smooth	Thick wall	none	Klebsiella pneumonia	39	30	yes	no	no	12.35	135.2	16.36
male	29	fibrosis	right	single	7.4	Miscibility	multilocular	none	none	none	yes	Irregular or indistinct	Thick wall	yes	Klebsiella pneumonia	39.5	6	no	no	no	22.96	103	3.15
male	43	fatty liver	right	single	13.5	Solid dominance	multilocular	none	none	none	yes	Smooth	Thick wall	yes	Klebsiella pneumonia	39.3	9	no	no	no	15.72	113.778	0.22
female	52	fibrosis	right	single	13.5	Cystic dominance	multilocular	none	none	none	yes	Smooth	Thick wall	yes	Klebsiella pneumonia	40	65	no	no	no	12.38	113.731	17.3773
female	52	fibrosis	right	single	6.1	Solid dominance	unilocular	none	none	none	none	Irregular or indistinct	Immural	none	Klebsiella pneumonia	40	65	no	no	no	1.56	1651.58	5.89
male	70	fibrosis	left	single	7.9	Cystic dominance	unilocular	none	none	none	yes	Smooth	Thick wall	none	Klebsiella pneumonia	38.83	35.6875	no	no	no	3.04	58.2825	5.88225
female	39	fatty liver	right	single	5.6	Cystic dominance	unilocular	none	none	none	yes	Smooth	Thick wall	none	Klebsiella pneumonia	39	16	yes	no	no	5.21	51.4759	0.06
male	52	fatty liver	right	single	9.7	Cystic dominance	unilocular	none	yes	none	yes	Smooth	Thick wall	none	Klebsiella pneumonia	38.5	13	yes	no	no	11.56	240.8	2.63
male	52	fatty liver	right	single	7.2	Solid dominance	unilocular	none	none	yes	none	Irregular or indistinct	Immural	none	Klebsiella pneumonia	38.5	13	yes	no	no	4.45	102.3	0.79
male	59	fibrosis	right	single	6.8	Miscibility	multilocular	none	none	none	none	Irregular or indistinct	Thick wall	yes	Klebsiella pneumonia	38	7	yes	no	no	2.56	60	0.274
male	49	fatty liver	left	single	7.1	Solid dominance	multilocular	none	none	none	yes	Irregular or indistinct	Thick wall	yes	Klebsiella pneumonia	38	14	yes	no	no	5.34	50.5	0.158
male	55	fibrosis	right	single	9.2	Miscibility	multilocular	none	none	yes	yes	Smooth	Thick wall	yes	Klebsiella pneumonia	39.7	14	yes	no	no	5.99	96.0675	7.64
male	59	fibrosis	left	two	6	Miscibility	unilocular	none	none	none	none	Smooth	Thin wall	none	Klebsiella pneumonia	42	150	no	no	no	4.389	112.2	1.17
male	38	fatty liver	both	single	5.3	Solid dominance	unilocular	none	none	yes	yes	Irregular or indistinct	Thin wall	none	Klebsiella pneumonia	40	40	no	no	no	8.8	109.9	0.19
male	66	fatty liver	both	single	5	Solid	none	none	none	none	yes	Irregular or indistinct	Thin wall	none	Klebsiella pneumonia	39.8	12	no	no	no	8.6	81.8671	0.15
male	81	fatty liver	both	single	7.9	Miscibility	unilocular	none	none	none	yes	Smooth	Thin wall	none	Klebsiella pneumonia	41	15	no	no	no	6.23	74	7.78
female	48	fatty liver	both	single	15.4	Miscibility	unilocular	none	none	none	yes	Smooth	Thin wall	none	Klebsiella pneumonia	39	18	yes	no	no	9.12	118.78	0.408
male	66	fibrosis	left	single	8.1	Cystic dominance	unilocular	none	none	none	none	Smooth	Thin wall	none	Klebsiella pneumonia	39.5	8	no	no	no	1.92	178	45.01
female	54	fatty liver	both	single	9	Solid dominance	unilocular	none	none	none	none	Smooth	Thin wall	none	Klebsiella pneumonia	40	12	yes	no	no	7.26	105.389	0.182
male	69	fatty liver	right	single	5.8	Cystic dominance	unilocular	none	none	none	none	Smooth	Thin wall	none	Klebsiella pneumonia	39.5	9	no	no	no	12.44	140.749	0.41
male	61	fatty liver	right	single	7.1	Miscibility	unilocular	none	none	none	none	Smooth	Thick wall	none	Klebsiella pneumonia	41	8	yes	no	no	8.4	132.73	100
male	50	fatty liver	right	single	5.6	Cystic dominance	unilocular	none	none	none	yes	Smooth	Thick wall	none	Klebsiella pneumonia	40.5	7	no	no	no	5.25	82.0412	2.53467
male	54	fatty liver	both	single	4.8	Cystic dominance	unilocular	none	none	none	none	Smooth	Thick wall	none	Klebsiella pneumonia	38.5	5	no	no	no	5.33	80.9	22.31
male	50	fibrosis	both	three or more	4.1	Cystic dominance	multilocular	none	none	none	yes	Irregular or indistinct	Thick wall	yes	Klebsiella pneumonia	40	7	yes	no	no	6.78	60.51	4.33
male	63	fibrosis	both	three or more	3.7	Cystic dominance	unilocular	none	none	none	yes	Smooth	Thick wall	none	Klebsiella pneumonia	39.122	12.74	yes	no	no	9.52	208.9	46.26
female	67	fibrosis	left	single	6.8	Cystic dominance	multilocular	none	none	none	yes	Smooth	Thick wall	yes	Klebsiella pneumonia	39	15	yes	no	no	2.59	65.1139	0.77
male	42	fatty liver	right	single	4.7	Cystic dominance	unilocular	none	none	none	yes	Smooth	Thick wall	none	Klebsiella pneumonia	40.3	5	no	no	no	9.12	46.88	1.75
male	56	fatty liver	right	single	8.3	Cystic dominance	unilocular	none	none	none	none	Smooth	Thick wall	none	Klebsiella pneumonia	38.5	7	yes	no	no	8.96	85	4.99
male	63	fatty liver	both	three or more	8.2	Cystic	unilocular	none	none	none	none	Smooth	Immural	none	Klebsiella pneumonia	39.1257	18.153	no	no	no	5.72	87.9	0.79
male	28	fatty liver	both	three or more	5.2	Solid dominance	multilocular	none	none	none	none	Smooth	Thick wall	yes	Klebsiella pneumonia	38	15	no	no	no	8.63	139.2	2.37592
male	61	fatty liver	right	single	10.1	Cystic dominance	multilocular	none	none	none	yes	Smooth	Thick wall	yes	Klebsiella pneumonia	39.4	10	no	no	no	9.54	110.004	1.20035
female	68	fibrosis	left	single	16.1	Cystic dominance	unilocular	none	none	none	yes	Smooth	Thick wall	none	Klebsiella pneumonia	39.0034	9.005	no	no	no	11.92	166.91	1.9
male	55	fatty liver	left	single	8.2	Cystic dominance	unilocular	none	none	none	none	Smooth	Thick wall	none	Klebsiella pneumonia	39	5	no	no	no	6.95	154.2	0.963
male	52	fibrosis	right	single	4.7	Cystic dominance	multilocular	none	none	none	none	Smooth	Thick wall	yes	Klebsiella pneumonia	39.8	8	no	no	no	3.04	1.4	0.06
female	54	fibrosis	both	three or more	6.5	Cystic dominance	multilocular	none	none	none	yes	Smooth	Thick wall	yes	Klebsiella pneumonia	40	8	yes	no	no	1.31	1101.53	0.043
female	64	fatty liver	right	single	5.7	Cystic dominance	unilocular	none	none	none	none	Smooth	Thick wall	none	Klebsiella pneumonia	39	7	no	no	no	8.69	181.46	0.219
female	50	fatty liver	right	single	3.4	Cystic dominance	unilocular	none	none	none	yes	Smooth	Thick wall	none	Klebsiella pneumonia	39	7	no	yes	no	7.03	104.896	0.42
female	68	fibrosis	both	single	6.4	Cystic dominance	unilocular	none	none	none	none	Smooth	Thick wall	none	Klebsiella pneumonia	38.9	5	yes	no	no	11.03	264.34	0.48
female	68	fibrosis	right	single	7.6	Cystic dominance	multilocular	none	yes	yes	yes	Smooth	Thick wall	yes	Klebsiella pneumonia	39	7	no	no	no	6.49	108.25	0.148
female	69	fatty liver	both	single	5.6	Cystic dominance	multilocular	none	none	none	yes	Irregular or indistinct	Thick wall	yes	Klebsiella pneumonia	39	15	no	no	no	3.3	59.9	0.167
female	69	fibrosis	right	single	4.8	Solid	none	none	none	none	none	Smooth	Thin wall	none	Klebsiella pneumonia	39.8	60	yes	no	no	2.46	1.4	0.814801
female	59	fatty liver	both	three or more	2.7	Miscibility	unilocular	none	none	none	none	Smooth	Thick wall	none	Klebsiella pneumonia	39	60	no	no	no	7.14	8.83	0.096
male	53	fibrosis	right	single	6	Cystic dominance	unilocular	yes	yes	yes	none	Smooth	Thick wall	none	Klebsiella pneumonia	39	60	no	no	no	10.91	49.2	0.28
male	70	fibrosis	right	single	3.2	Miscibility	unilocular	none	none	yes	yes	Irregular or indistinct	Thick wall	yes	Staphylococcus	39.363	31.629	no	yes	no	8.59	638.905	8.15133
female	43	fatty liver	right	single	9.4	Miscibility	unilocular	none	yes	none	yes	Irregular or indistinct	Thick wall	none	Staphylococcus	43	15	no	no	no	3.48	27.8	2.85043
male	46	fatty liver	right	single	5.8	Cystic dominance	unilocular	none	none	none	yes	Smooth	Thick wall	none	Klebsiella pneumonia	40	21	no	no	no	9.33	89.84	1.43
male	45	fibrosis	both	three or more	5.9	Miscibility	unilocular	none	none	none	none	Smooth	Thick wall	none	Staphylococcus	40	21	no	yes	no	9.47	124	1.1
male	54	fibrosis	left	single	14	Miscibility	unilocular	yes	none	none	yes	Smooth	Thick wall	yes	Staphylococcus	39.551	22.65	no	no	no	2.82	45.28	0.312
male	30	fibrosis	both	three or more	11.1	Solid dominance	multilocular	yes	yes	yes	yes	Irregular or indistinct	Thick wall	yes	Staphylococcus	40	60	yes	no	no	12.68	33	28.85
female	66	fatty liver	left	single	7.5	Solid dominance	unilocular	none	none	none	none	Irregular or indistinct	Immural	yes	Staphylococcus	39	300	no	yes	yes	4.82	53.4	0.47
male	32	fibrosis	right	three or more	5.4	Cystic	unilocular	none	yes	none	none	Smooth	Thin wall	none	Staphylococcus	38.5	10	no	no	no	7.2	655.284	0.74
male	8	fatty liver	right	single	5.3	Miscibility	unilocular	none	none	none	yes	Irregular or indistinct	Thick wall	yes	Staphylococcus	39.7	20	no	no	no	2.8	81	0.21
male	32	fatty liver	right	single	5.3	Solid	none	none	none	none	none	Smooth	Thin wall	none	Staphylococcus	39.768	30.46	no	no	no	12.51	101.5	0.79
male	33	fatty liver	right	three or more	4.5	Cystic	unilocular	none	yes	none	yes	Smooth	Thick wall	none	Staphylococcus	40	300	no	no	no	5.88	3.66	0.057
male	58	fibrosis	left	single	5	Miscibility	multilocular	none	none	none	none	Irregular or indistinct	Thick wall	yes	Staphylococcus	39.196	0.5	no	yes	no	12.908	228.8	41.53
male	47	fatty liver	right	three or more	8	Cystic	unilocular	none	yes	none	yes	Smooth	Thin wall	none	Streptococcus	41	20	no	no	no	7.45	206.5	0.326
male	56	fibrosis	right	single	10.2	Miscibility	multilocular	yes	yes	none	yes	Irregular or indistinct	Thick wall	yes	Streptococcus	41	20	no	no	yes	13.83	60.71	3.26
male	58	fatty liver	right	single	9.5	Cystic dominance	unilocular	yes	none	yes	none	Smooth	Thick wall	none	Streptococcus	37.1	4	no	yes	yes	11.39	54.5	2.24
female	66	fatty liver	both	three or more	7.4	Solid dominance	unilocular	none	none	yes	yes	Smooth	Thick wall	none	Staphylococcus	38.5	7	no	yes	no	9	203.96	1.02
female	63	fatty liver	right	two	4.4	Cystic dominance	unilocular	none	yes	none	yes	Smooth	Thick wall	yes	Staphylococcus	38.5	21	no	no	no	2.05	10.9	0.12
male	60	fatty liver	right	single	8.7	Miscibility	unilocular	none	yes	none	yes	Irregular or indistinct	Thick wall	yes	Staphylococcus	42	15	no	no	no	1.5	4.18	0.224
male	60	fatty liver	right	single	7.2	Solid dominance	unilocular	none	none	none	none	Smooth	Thick wall	none	Streptococcus	42	15	no	no	no	1.5	4.18	0.224
male	60	fatty liver	right	single	7.2	Solid dominance	unilocular	none	none	none	none	Smooth	Thick wall	none	Streptococcus	42	15	no	no	no	1.5	4.18	0.224
female	71	fatty liver	right	single	7.4	Miscibility	unilocular	none	none	none	yes	Smooth	Thick wall	yes	Streptococcus	42	3	no	no	no	9.33	180.3	4.05
male	68	fibrosis	both	single	6.9	Cystic	unilocular	none	none	none	none	Smooth	Thick wall	none	Streptococcus	39.692	4	yes	no	yes	1.66	6.9	0.064
male	68	fibrosis	both	single	6.9	Cystic	unilocular	none	none	none	none	Smooth	Thick wall	none	Streptococcus	39.685	4	yes	no	yes	1.66	6.9	0.064
male	29	fibrosis	both	three or more	10.1	Miscibility	multilocular	none	none	none	yes	Smooth	Thick wall	yes	Klebsiella pneumonia	39	17	no	no	no	4.11	1117.03	0.073
male	61	fatty liver	right	single	12.2	Solid dominance	multilocular	none	none	yes	yes	Irregular or indistinct	Thick wall	yes	Klebsiella pneumonia	38.8	3	no	yes	no	12.1	33.9	1.81
male	61	fatty liver	both	three or more	5	Miscibility	multilocular	none	none	none	yes	Irregular or indistinct	Thick wall	yes	Klebsiella pneumonia	39.359	36.605	no	yes	yes	11.47	117.8	2.72
male	46	fatty liver	right	three or more	6.2	Solid dominance	multilocular	none	none	yes	none	Smooth	Thin wall	none	Klebsiella pneumonia	39.082	40.8	no	yes	yes	9.15	118.6	1.58
male	69	fibrosis	right	single	5.2	Solid	none	none	none	none	yes	Smooth	Immural	none	Klebsiella pneumonia	38	14	yes	no	no	7.89	105	2.95
male	69	fibrosis	right	single	5.2	Solid	none	none	none	none	yes	Smooth	Immural	none	Klebsiella pneumonia	38	14	yes	no	no	7.89	105	2.95
female	48	fibrosis	right	three or more	8.1	Miscibility	multilocular	yes	yes	yes	yes	Smooth	Thick wall	none	Streptococcus	38	33.155	no	yes	yes	25.93	160.6	5.28
female	48	fibrosis	right	three or more	8.1	Miscibility	multilocular	yes	yes	yes	yes	Smooth	Thick wall	none	Streptococcus	38	36.935	no	yes	yes	25.93	160.6	5.28
male	33	fatty liver	right	single	8.1	Cystic dominance	multilocular	none	none	none	yes	Irregular or indistinct	Thick wall	yes	Enterococcus	38.5	5	no	no	no	5.9	79.2	0.14
female	64	normal	right	single	7.1	Cystic dominance	unilocular	none	none	none	none	Smooth	Thick wall	none	Enterococcus	40	27	yes	no	no	9.95	40.3	0.14
female	75	fibrosis	both	three or more	10.8	Cystic dominance	multilocular	yes	none	yes	none	Irregular or indistinct	Thick wall	yes	Enterococcus	39.2	78	no	yes	no	5.25	65.9	0.18
male	43	normal	both	three or more	3.2	Cystic dominance	unilocular	none	none	none	none	Irregular or indistinct	Thick wall	yes	Enterococcus	40	3	yes	no	no	8.84	5.9	0.06
male	52	fibrosis	left	single	9.1	Cystic	multilocular	none	none	none	none	Irregular or indistinct	Thick wall	yes	Enterococcus	39	30	no	no	no	8.92	43.2	0.13
male	67	fatty liver	left	single	12.7	Solid dominance	unilocular	yes	yes	none	none	Irregular or indistinct	Thick wall	yes	Streptococcus	38.5	20	yes	no	no	11.45	41.5	0.237
male	23	fatty liver	left	single	8.2	Cystic	unilocular	yes	none	none	yes	Smooth	Thin wall	none	Streptococcus	39	8	no	no	no	15.52	32.1	0.219
female	75	normal	left	two	8.2	Cystic	unilocular	none	yes	none	yes	Smooth	Thin wall	none	Streptococcus	39	60	yes	yes	no	18.16	43.3	1.27
female	65	fatty liver	right	single	11.5	Miscibility	multilocular	none	none	none	yes	Irregular or indistinct	Thick wall	yes	Streptococcus	40.5	14	no	no	no	11.9	32.4	0.12
male	57	normal	right	single	8.5	Cystic dominance	unilocular	none	none	none	none	Smooth	Thick wall	yes	Streptococcus	39.6	6	no	no	no	12.41	134.088	1.46
male	58	fatty liver	left	single	13.3	Cystic	unilocular	none	none	yes	yes	Smooth	Thick wall	none	Streptococcus	39.0944	19.7	yes	no	yes	11.06	136.815	26.88
male	53	fatty liver	right	single	9.7	Miscibility	multilocular	none	none	yes	yes	Smooth	Thick wall	yes	Streptococcus	39.611	31	no	no	no	11.91	102.586	4.8287
male	31	fatty liver	left	single	9.9	Cystic	unilocular	none	none	none	none	Smooth	Thick wall	yes	Klebsiella pneumonia	40	10	no	no	no	7.03	76.7	0.18
female	53	fatty liver	right	single	10.8	Solid dominance	multilocular	none	none	yes	yes	Irregular or indistinct	Immural	yes	Klebsiella pneumonia	42	14	no	no	no	9.39	93.6799	1.07934
male	54	fibrosis	right	single	4.2	Cystic	unilocular	none	none	none	none	Smooth	Thick wall	none	Klebsiella pneumonia	38	120	yes	no	no	5.17	77.18	4.83203
male	54	fibrosis	right	single	4.2	Cystic	unilocular	none	none	none	none	Smooth	Thick wall	none	Klebsiella pneumonia	38	120	yes	no	no	5.17	77.18	4.83203
male	50	fibrosis	both	single	10.6	Cystic dominance	unilocular	none	yes	yes	yes	Irregular or indistinct	Thick wall	yes	Streptococcus	39	33	yes	no	no	9.06	167.6	0.586
male	34	fatty liver	both	single	6.6	Miscibility	multilocular	none	yes	none	none	Smooth	Thick wall	yes	Streptococcus	40	10	no	no	no	8.57	253.4	0.72
male	34	fatty liver	both	single	4.7	Solid dominance	unilocular	none	none	yes	none	Smooth	Thick wall	none	Streptococcus	40	10	no	no	no	3.96	9.5	0.06
female	65	fatty liver	both	single	4.3	Cystic	unilocular	none	none	none	none	Smooth	Thick wall	none	Enterococcus	38.5	45	no	no	no	3.36	52.19	0.125
male	45	fatty liver	right	single	6.3	Cystic dominance	unilocular	none	none	none	none	Smooth	Thick wall	none	Enterococcus	38.6	5	no	no	no	8.32	208.5	1.78
male	54	fatty liver	both	three or more	4.4	Cystic dominance	unilocular	none	none	none	yes	Smooth	Thick wall	none	Enterococcus	39.354	15	no	no	no	18.11	184.6	0.552
female	49	normal	right	single	8.3	Solid	none	none	none	none	yes	Smooth	Thin wall	none	Klebsiella pneumonia	40	60	no	yes	no	2.49	1121.41	2.53521
male	25	normal	both	single	9.5	Solid dominance	multilocular	none	yes	none	yes	Irregular or indistinct	Thick wall	yes	Klebsiella pneumonia	39.5	16	no	no	no	6.01	27.3	2.58
male	66	normal	left	single	6.4	Miscibility	multilocular	none	yes	none	yes	Smooth	Thick wall	yes	Klebsiella pneumonia	39.383	11.5767	no	no	no	7.00581	93.73	1.15178
male	66	fatty liver	right	single	2.6	Cystic	unilocular	none	none	none	yes	Smooth	Thick wall	yes	Klebsiella pneumonia	39.183	17.805	no	yes	no	5.68	91.7	2.91
male	56	fibrosis	right	single	3.3	Cystic	unilocular	none	yes	none	none	Smooth	Thin wall	none	Klebsiella pneumonia	38.9	30	no	no	yes	5.28	74.692	2.33123
female	43	normal	right	single	4.4	Solid	none	none	none	none	none	Smooth	Thin wall	none	Klebsiella pneumonia	40	30	no	no	no	0.86	9.3	0.37
male	42	normal	right	three or more	6.6	Cystic dominance	multilocular	none	none	none	yes	Irregular or indistinct	Immural	yes	Klebsiella pneumonia	39.8	10	no	no	no	6.87	29.9	0.09
female	42	normal	right	two	1.4	Solid	none	none	none	none	none	Smooth	Immural	none	Klebsiella pneumonia	39.343	13	no	no	no	2.34	4308.75	4.42718
male	49	fibrosis	right	single	6.4	Miscibility	unilocular	none	none	yes	yes	Smooth	Thick wall	yes	Enterococcus	39.628	16.78	no	no	yes	4.06	21.2	3.61165
female	59	normal	right	single	2.9	Solid dominance	unilocular	none	none	none	yes	Irregular or indistinct	Immural	none	Klebsiella pneumonia	39.4	6	no	yes	no	2.42	1136.47	4.8172
female	38	fatty liver	left	single	4.4	Cystic	unilocular	none	none	none	yes	Smooth	Thin wall	none	Klebsiella pneumonia	37.2	21	no	no	no	1.32	1.7	0.032
male	34	normal	right	single	6.5	Solid dominance	multilocular	none	none	none	yes	Irregular or indistinct	Thick wall	yes	Klebsiella pneumonia	40	5	no	no	no	8.47	53.4	0.26
male	43	normal	right	single	8.6	Miscibility	unilocular	none	yes	none	none	Irregular or indistinct	Thick wall	yes	Klebsiella pneumonia	39.48	8.77	no	no	no	10.8953	113.535	1.42056
male	54	normal	right	three or more	6.7	Cystic dominance	multilocular	none	none	none	yes	Irregular or indistinct	Thick wall	yes	Klebsiella pneumonia	39	3	yes	no	no	1.69	1139.41	2.76769
female	67	normal	both	single	4.3	Miscibility	unilocular	none	none	none	yes	Irregular or indistinct	Thick wall	yes	Klebsiella pneumonia	39.213	20.21	no	yes	no	2.5	25.3	4.27
male	39	normal	right	single	5.7	Miscibility	multilocular	none	none	none	yes	Smooth	Thick wall	yes	Klebsiella pneumonia	39.094	15.6283	yes	yes	no	5.94	657.579	20.5211
female	69	normal	right	single	13	Miscibility	multilocular	none	none	none	yes	Irregular or indistinct	Thick wall	yes	Klebsiella pneumonia	39	7	no	no	no	10.54	121.992	5.03514
male	53	normal	right	single	11.8	Solid	none	none	none	none	yes	Smooth	Thin wall	none	Klebsiella pneumonia	41	9	yes	no	no	7.01	116.3	0.27
male	60	fatty liver	right	single	6.2	Cystic dominance	unilocular	none	none	none	yes	Smooth	Thick wall	yes	Klebsiella pneumonia	39.5	7	no	no	no	8.22181	106.845	0.54
female	41	normal	right	single	6.1	Cystic	unilocular	none	none	none	none	Smooth	Thin wall	none	Klebsiella pneumonia	40	7	yes	no	no	8.24	137.5	0.484
male	44	fatty liver	right	two	4	Cystic	unilocular	none	none	none	none	Smooth	Thin wall	none	Klebsiella pneumonia	39.595	18.52	no	no	no	8.24	137.5	0.484
male	65	normal	left	single	3.1	Miscibility	unilocular	none	none	yes	none	Irregular or indistinct	Thick wall	yes	Klebsiella pneumonia	39.185	16	yes	no	no	6.12	69.1087	0.39043
female	52	fatty liver	right	single	7	Solid dominance	unilocular	none	none	yes	none	Smooth	Thin wall	none	Klebsiella pneumonia	39.4	7	no	no	no	7.5	67.7	0.29
female	68	fatty liver	right	single	5.4	Cystic dominance	unilocular	none	none	none	yes	Smooth	Thick wall	yes	Klebsiella pneumonia	39	13	no	no	no	5.36	52.1	0.092
male	55	fibrosis	right	three or more	5.3	Cystic	unilocular	none	none	none	none	Smooth	Thin wall	none	Klebsiella pneumonia	38.6	7	yes	no	no	7.75	104.48	1.72
male	58	normal	right	single	5	Solid	none	none	none	yes	yes	Irregular or indistinct	Immural	none	Klebsiella pneumonia	39.217	14.35	no	no	no	7.75	104.48	1.72
male	66	normal	right	three or more	8.4	Miscibility	multilocular	none	yes	none	yes	Irregular or indistinct	Thick wall	yes	Klebsiella pneumonia	39.385	30	no	no	no	2.68	1124.28	3.41144
male	45	normal	right	single	9.7	Miscibility	multilocular	none	yes	yes	none	Irregular or indistinct	Thick wall	yes	Klebsiella pneumonia	40	15	yes	no	no	22.33	639.715	84.9
male	43	fibrosis	both	three or more	7.6	Miscibility	multilocular	none	none	none	yes	Irregular or indistinct	Thick wall	yes	Klebsiella pneumonia	39	30	yes	no	no	7.23	121.609	28.89
male	43	fibrosis	right	single	5.3	Solid	none	none	none	yes	none	Irregular or indistinct	Immural	none	Klebsiella pneumonia	39	30	yes	no	no	9.21	113.978	1.01
male	47	fibrosis	right	single	5.3	Cystic dominance	unilocular	none	none	yes	yes	Smooth	Thick wall	yes	Enterococcus	40	21	no	no	yes	15.94	109.014	5.37
male	47	fibrosis	right	single	3.8	Solid	none	none	none	yes	none	Smooth	Thick wall	none	Enterococcus	40	21	no	no	yes	4.46	64.6226	0.447
male	60	fatty liver	left	single	9.3	Cystic dominance	unilocular	none	none	none	yes	Smooth	Thick wall	yes	Klebsiella pneumonia	39	5	yes	no	no	14.41	132.579	3.89061
male	51	fibrosis	right	single	5	Solid	none	none	none	yes	none	Irregular or indistinct	Immural	none	Klebsiella pneumonia	39.606	20.81	no	no	no	14.41	95.1934	3.43175
male	44	fatty liver	right	single	3.6	Solid dominance	unilocular	none	none	yes	none	Smooth	Thin wall	none	Klebsiella pneumonia	39.666	16.04	no	no	no	14.41	91.0078	2.80285
female	53	normal	right	single	7.1	Miscibility	multilocular	none	none	none	yes	Irregular or indistinct	Thick wall	yes	Klebsiella pneumonia	40	15	no	no	no	7.69	45.5542	0.11
female	53	normal	right	single	7.1	Miscibility	multilocular	none	none	none	yes	Irregular or indistinct	Thick wall	yes	Klebsiella pneumonia	39.562	10.47	no	no	no	10.6552	107.761	0.79574
male	62	normal	right	single	6.8	Miscibility	multilocular	none	yes	yes	none	Irregular or indistinct	Thick wall	yes	Klebsiella pneumonia	39.495	10.85	no	no	no	7.95874	91.3518	1.16118
female	53	normal	right	single	11.9	Solid dominance	multilocular	none	yes	none	yes	Irregular or indistinct	Thick wall	yes	Klebsiella pneumonia	40.4	6	no	no	no	11.38	148.7	0.944
female	53	normal	right	single	5.3	Solid	none	none	none	yes	none	Irregular or indistinct	Immural	none	Klebsiella pneumonia	40.4	6	no	no	no	8.27	112.07	0.39
male	74	normal	right	single	9	Cystic dominance	unilocular	none	none	none	none	Smooth	Thick wall	none	Klebsiella pneumonia	39.31	8.81	no	no	no	12.6954	129.622	2.72215
male	41	fibrosis	right	single	5.8	Solid dominance	multilocular	none	none	none	yes	Irregular or indistinct	Thick wall	none	Klebsiella pneumonia	41	20	yes	no	no	12.64	57.46	0.768
male	56	fatty liver	right	single	2.1	Cystic	unilocular	none	none	none	yes	Irregular or indistinct	Immural	none	Klebsiella pneumonia	39.461	19.33	no	no	no	5.0302	61.8903	0.779648
female	41	fatty liver	right	single	6.4	Cystic dominance	multilocular	none	none	none	none	Irregular or indistinct	Thick wall	yes	Klebsiella pneumonia	39.5362	17.7833	no	no	no	14.4	104.7	0.76143
female	50	normal	both	three or more	7.1	Cystic dominance	unilocular	none	none	none	none	Smooth	Thin wall	none	Klebsiella pneumonia	39	45	yes	no	no	4.69	96.3	0.28
male	59	fatty liver	right	single	2.5	Solid	none	none	none	none	none	Smooth	Thin wall	none	Klebsiella pneumonia	39.729	18.855	no	no	no	4.83731	62.3246	1.60852
male	58	fatty liver	right	single	7.6	Miscibility	multilocular	none	none	yes	yes	Irregular or indistinct	Thick wall	yes	Klebsiella pneumonia	39.534	11.08	no	no	no	8.00604	97.0007	0.85122
male	58	fatty liver	both	three or more	5.1	Cystic dominance	multilocular	none	yes	none	none	Irregular or indistinct	Thick wall	yes	Klebsiella pneumonia	42	7	no	no	no	5.81	92.8835	0.92107
male	74	normal	both	three or more	7.3	Cystic dominance	multilocular	yes	none	none	none	Irregular or indistinct	Thick wall	yes	Klebsiella pneumonia	38.995	26.515	no	yes	no	27.75	176	25.79
male	42	fibrosis	right	two	12.3	Solid dominance	unilocular	none	none	yes	none	Smooth	Thin wall	none	Klebsiella pneumonia	39.7624	13.46	no	no	no	9.13002	92.4149	1.0966
female	72	fibrosis	right	single	3.7	Cystic	unilocular	none	none	none	yes	Smooth	Thick wall	yes	Klebsiella pneumonia	39.342	23.47	yes	no	no	3.18	11	0.096
male	60	normal	right	single	6.3	Miscibility	unilocular	none	yes	none	yes	Irregular or indistinct	Thick wall	yes	Klebsiella pneumonia	39.496	12.7283	yes	no	no	5.2	40.61	0.134
male	54	fibrosis	right	single	4.8	Solid dominance	unilocular	yes	none	yes	yes	Smooth	Immural	none	Klebsiella pneumonia	39.472	22.2763	no	no	no	3.6	0.44	0.076
male	35	normal	right	single	6.9	Cystic dominance	unilocular	none	none	none	yes	Smooth	Thick wall	yes	Klebsiella pneumonia	39.5	15	no	no	no	5.68	49.6	0.074
male	55	fatty liver	right	single	7.3	Cystic dominance	multilocular	none	yes	yes	yes	Irregular or indistinct	Thick wall	yes	Klebsiella pneumonia	39	60	no	no	no	4.24	64.8484	0.71427
male	69	fibrosis	both	three or more	4	Miscibility	unilocular	none	none	yes	none	Smooth	Thick wall	yes	Klebsiella pneumonia	39.246	16.59	no	no	no	13.5265	682.849	14.1014
male	37	normal	right	single	6.3	Solid dominance	unilocular	none	none	yes	none	Irregular or indistinct	Immural	none	Klebsiella pneumonia	40	9	no	no	no	5.9	18.3	0.08
female	50	fatty liver	both	three or more	6.6	Cystic	unilocular	none	none	none	none	Smooth	Thin wall	none	Klebsiella pneumonia	39.319	28.883	no	no	no	2.18	1112.07	1.38646
male	49	fatty liver	right	single	4.2	Cystic dominance	unilocular	none	none	none	none	Smooth	Thick wall	yes	Klebsiella pneumonia	39	7	no	no	no	3.38	96.76	2.97113
male	32	normal	right	single	4	Solid	none	none	none	yes	none	Irregular or indistinct	Immural	none	Klebsiella pneumonia	39.5	1	no	no	no	4.62	77.6968	0.16
male	32	normal	right	three or more	11.6	Miscibility	unilocular	yes	none	none	yes	Irregular or indistinct	Immural	none	Klebsiella pneumonia	40	30	no	no	no	9.36	124.84	25.4534
male	38	normal	right	single	2.7	Solid	none	none	none	none	none	Smooth	Thin wall	none	Escherichia coli	39.387	17.425	no	no	no	4.6224	43.2427	0.567394
male	60	normal	right	single	6.6	Cystic dominance	unilocular	none	yes	none	none	Smooth	Thick wall	yes	Enterococcus	39.462	15.42	no	no	yes	18	149.9	0.276
male	51	fibrosis	left	single	4.2	Miscibility	multilocular	none	none	none	none	Irregular or indistinct	Thick wall	yes	Enterococcus	40	15	no	no	yes	4.82	618.283	1.71935
female	66	normal	right	three or more	6.3	Miscibility	multilocular	none	none	yes	yes	Irregular or indistinct	Thick wall	yes	Escherichia coli	38	7	yes	no	no	3.6	245.94	7.17
male	75	normal	right	single	7.5	Solid dominance	unilocular	none	yes	yes	none	Irregular or indistinct	Thick wall	yes	Escherichia coli	39	22	no	no	no	4.76	38.979	0.1
male	35	fatty liver	right	single	5	Solid dominance	unilocular	none	none	none	yes	Smooth	Thick wall	none	Propionibacterium bullosum	39.1	16	no	no	no	2.8	41.3656	0.06
male	53	fatty liver	both	single	6.3	Miscibility	unilocular	yes	none	yes	none	Irregular or indistinct	Immural	none	Escherichia coli	40	5	yes	no	no	7.81	687.102	9.48
male	62	normal	right	single	7.4	Cystic dominance	unilocular	none	none	none	none	Smooth	Thick wall	yes	Escherichia coli	38	7	yes	no	no	8.39	84.914	0.04
male	45	fibrosis	right	single	9.9	Cystic	unilocular	none	none	none	none	Smooth	Thick wall	none	Escherichia coli	40	31	no	no	no	4.79	166.4	0.467
male	52	normal	both	three or more	4.1	Cystic	unilocular	none	yes	none	yes	Smooth	Thick wall	yes	Escherichia coli	39.299	29.7914	no	no	no	9.15722	1192.36	1.73765
male	49	fatty liver	right	single	5.1	Cystic dominance	unilocular	none	none	none	yes	Smooth	Thick wall	yes	Escherichia coli	40	1	yes	no	no	6.11	46.8	0.236
male	28	normal	left	single	8.6	Cystic	unilocular	none	yes	none	yes	Smooth	Thick wall	none	Escherichia coli	39	7	no	no	no	8.96	217.4	0.58
male	28	normal	left	single	2.3	Solid	none	none	none	none	none	Irregular or indistinct	Immural	none	Escherichia coli	39	7	no	no	no	4.06	5.6	0.05
male	73	fibrosis	right	two	5.6	Solid dominance	unilocular	yes	none	yes	yes	Irregular or indistinct	Thick wall	none	Escherichia coli	39.285	12.14	no	no	no	10.932	113.685	1.5774
male	39	fibrosis	both	three or more	2.6	Cystic dominance	unilocular	none	none	none	none	Irregular or indistinct	Thin wall	none	Escherichia coli	39.519	40	yes	no	no	6.88	80.0567	1.62873
female	29	normal	right	single	3.9	Solid	none	none	none	none	none	Irregular or indistinct	Immural	none	Escherichia coli	39.3905	19.175	no	no	no	5.00411	48.0833	0.238354
male	63	fibrosis	right	single	7.4	Solid dominance	unilocular	yes	none	yes	none	Irregular or indistinct	Immural	none	Escherichia coli	40	7	no	yes	yes	8.58	69.4029	0.1
male	39	fatty liver	right	single	8	Cystic dominance	multilocular	none	none	none	yes	Smooth	Thick wall	none	Escherichia coli	39.7	7	no	no	no	9.81	152.6	0.716
male	47	normal	right	single	3.7	Solid	none	none	none	none	none	Irregular or indistinct	Thin wall	none	Escherichia coli	39.391	15.835	no	no	no	4.42525	40.4404	0.317548
male	52	fatty liver	both	single	8.3	Solid	none	none	none	yes	yes	Smooth	Thin wall	none	Escherichia coli	39.754	16.57	no	no	no	7.9451	105.572	0.92686
female	72	fatty liver	left	single	4.5	Miscibility	multilocular	none	none	none	yes	Smooth	Thick wall	yes	Escherichia coli	39.362	11.9667	no	no	no	7.01562	93.5963	1.22649
male	55	fatty liver	right	single	9	Miscibility	unilocular	yes	yes	yes	none	Irregular or indistinct	Immural	none	Escherichia coli	38.5	11	yes	no	no	10.83	152.9	3.08
male	61	normal	right	single	6.9	Cystic dominance	multilocular	none	none	yes	none	Smooth	Thick wall	yes	Escherichia coli	40	10	no	no	no	6.15	71.1	5.23
female	61	fibrosis	both	single	3.8	Cystic dominance	unilocular	none	yes	none	none	Smooth	Thick wall	none	Escherichia coli	39	30	no	no	no	8.7	103.5	0.1
male	34	fibrosis	right	single	6.6	Cystic dominance	unilocular	none	none	none	none	Smooth	Thick wall	none	Escherichia coli	37.6	60	yes	no	no	5.65	42.12	0.298
female	65	normal	right	single	5.8	Miscibility	unilocular	none	none	none	none	Irregular or indistinct	Thick wall	none	Escherichia coli	39.4	90	no	yes	no	3.7	3802.35	1.34
female	62	normal	right	single	4.6	Solid	none	none	none	none	none	Irregular or indistinct	Immural	none	Escherichia coli	39	6	yes	no	no	4.09	3.7	0.039
female	35	normal	both	two	3.1	Solid dominance	multilocular	none	none	none	yes	Irregular or indistinct	Immural	none	Escherichia coli	39	14	no	no	no	4.4	93.0445	0.743764
female	19	fibrosis	both	three or more	6.7	Cystic dominance	multilocular	none	yes	yes	yes	Smooth	Thick wall	none	Escherichia coli	39	42	no	no	no	0.85	7014.82	8.87117
male	39	normal	left	single	5.8	Cystic	unilocular	none	yes	none	none	Smooth	Thin wall	none	Propionibacterium bullosum	41	5	no	no	no	7.64	303.23	1.45
female	58	normal	right	single	7.1	Solid dominance	multilocular	none	yes	none	yes	Smooth	Thick wall	none	Escherichia coli	39	10	yes	no	no	5.86	42	0.71
female	67	normal	right	three or more	6.5	Cystic dominance	unilocular	none	none	none	yes	Smooth	Thick wall	none	Escherichia coli	39	30	yes	yes	no	8.97	105.7	2.94
male	32	normal	right	single	7.2	Solid dominance	unilocular	none	none	none	yes	Smooth	Thick wall	none	Escherichia coli	39.46	9.18	no	no	no	8.17014	103.1	0.70869
male	53	fatty liver	left	single	5.4	Miscibility	unilocular	none	yes	none	yes	Smooth	Thick wall	none	Escherichia coli	39.5863	9.98667	no	no	no	8.02671	652.644	1.98221
male	55	normal	right	single	11	Cystic dominance	unilocular	none	none	none	yes	Smooth	Thick wall	none	Escherichia coli	39.4238	15.31	yes	no	no	14.23	115.3	0.382
male	55	normal	right	single	4	Solid	none	none	none	yes	none	Smooth	Thin wall	none	Escherichia coli	39.168	63.6333	yes	no	no	2.13	36.9524	2.53574
male	37	normal	left	single	4.6	Solid dominance	unilocular	none	none	yes	none	Smooth	Thick wall	none	Escherichia coli	39.278	18.1733	no	no	no	4.574	41.502	0.21138
male	23	normal	left	single	7.3	Miscibility	unilocular	none	none	none	yes	Irregular or indistinct	Thick wall	none	Escherichia coli	39	14	no	no	no	7.311	147.75	0.401
male	23	normal	left	single	5.1	Solid	none	none	none	yes	yes	Irregular or indistinct	Immural	none	Escherichia coli	39	14	no	no	no	9.05598	660.894	9.04369
male	63	fatty liver	right	single	3.5	Solid	none	none	none	yes	none	Irregular or indistinct	Immural	none	Escherichia coli	41	14	no	no	no	4.33	47.247	0.634388
female	61	normal	both	two	7.6	Cystic dominance	unilocular	none	yes	none	yes	Smooth	Thick wall	none	Escherichia coli	39.8	23	yes	no	no	5.64	32.5	0.126
male	70	fibrosis	left	single	3.3	Cystic	unilocular	none	yes	none	yes	Smooth	Thick wall	none	Escherichia coli	39	30	no	yes	no	6.98	93.1143	0.70702
male	46	normal	right	single	7.3	Miscibility	unilocular	none	none	yes	yes	Smooth	Thick wall	none	Escherichia coli	39.7663	9.45667	no	no	no	8.13865	88.1076	0.76113
male	48	fatty liver	right	single	5.5	Solid	none	none	none	yes	yes	Irregular or indistinct	Immural	none	Escherichia coli	39.72	27.8	no	no	no	7.1758	94.5039	0.49825
male	59	normal	right	two	5	Solid dominance	multilocular	none	none	none	yes	Smooth	Thick wall	yes	Klebsiella pneumonia	38.2	15	yes	no	no	3.87	584.874	2.24608
female	67	fatty liver	right	single	5.7	Miscibility	multilocular	none	yes	none	yes	Smooth	Thick wall	yes	Klebsiella pneumonia	39.528	8.89667	no	no	no	7.83697	640.079	2.44268
male	80	normal	right	single	4.6	Miscibility	unilocular	none	none	none	none	Irregular or indistinct	Thick wall	none	Klebsiella pneumonia	40	2	no	no	no	21.02	174.4	24.2263
female	61	fatty liver	right	single	6.6	Cystic	unilocular	none	none	none	none	Smooth	Thick wall	none	Klebsiella pneumonia	39.786	43.615	no	no	no	1.96	15.4	0.038
female	61	fatty liver	right	single	5.4	Solid	none	none	none	yes	none	Irregular or indistinct	Immural	none	Klebsiella pneumonia	39.924	31.34	no	no	no	2.25	12.5	0.046
female	62	normal	right	single	8.8	Miscibility	multilocular	none	none	none	yes	Smooth	Thick wall	yes	Klebsiella pneumonia	40	15	no	no	no	4.08	236.6	10.48
male	64	normal	both	three or more	7	Cystic dominance	multilocular	none	yes	none	yes	Smooth	Thick wall	yes	Klebsiella pneumonia	39.6	2	yes	no	no	9.9	114.398	2.32248
female	54	fibrosis	right	single	6.1	Miscibility	unilocular	none	none	none	none	Smooth	Thick wall	none	Propionibacterium bullosum	39.759	1	no	no	yes	2.01	21.8	0.25
female	74	fatty liver	right	single	9	Cystic dominance	unilocular	none	none	none	none	Irregular or indistinct	Thick wall	none	Klebsiella pneumonia	38.8	16	yes	no	no	11.31	103.03	2.32
female	74	fatty liver	right	single	3.7	Solid	none	none	none	none	none	Irregular or indistinct	Immural	none	Klebsiella pneumonia	38.8	16	yes	no	no	2.87	66.6836	5.01126
male	52	fatty liver	right	single	4.4	Solid	none	none	none	yes	none	Smooth	Immural	none	Klebsiella pneumonia	40.4	5	no	no	no	3.26	42.6488	0.24
female	68	normal	right	single	11.1	Cystic	unilocular	yes	yes	none	none	Smooth	Thick wall	none	Klebsiella pneumonia	39	14	yes	no	no	8.04	69.39	0.276
female	71	normal	left	single	5.4	Cystic dominance	unilocular	none	yes	none	none	Smooth	Thick wall	none	Klebsiella pneumonia	39.088	11.425	no	no	no	6.81243	606.773	2.14816
male	72	fibrosis	right	single	4.8	Solid dominance	unilocular	none	none	yes	none	Smooth	Thin wall	none	Escherichia coli	39.719	22.97	no	no	no	1.63	22.6488	0.13
female	52	fatty liver	right	two	6.1	Miscibility	multilocular	none	none	none	none	Irregular or indistinct	Thick wall	yes	Pseudomonas aeruginosa	40	8	no	no	no	10.5	67.5	0.382
male	23	normal	left	two	3.4	Cystic dominance	unilocular	none	none	none	yes	Smooth	Thick wall	none	Pseudomonas aeruginosa	39	2	no	no	no	4.64	134.4	0.27
female	63	normal	right	single	6.4	Miscibility	multilocular	none	none	none	none	Irregular or indistinct	Thick wall	yes	Pseudomonas aeruginosa	38	5	yes	no	no	6.01	144	0.123
female	80	fatty liver	left	single	6	Miscibility	unilocular	none	none	none	none	Smooth	Thin wall	none	Pseudomonas aeruginosa	40	10	no	no	no	3.61	66.1613	2.16707
female	36	fatty liver	right	single	11.3	Solid dominance	multilocular	none	none	yes	yes	Smooth	Thin wall	none	Pseudomonas aeruginosa	40.7	11	no	no	no	16.41	128.332	2.12422
male	58	fibrosis	right	three or more	1.9	Solid dominance	multilocular	none	none	none	none	Smooth	Thin wall	none	Pseudomonas aeruginosa	39	3	yes	yes	no	1.44	84.1	0.69
male	30	normal	right	single	1.8	Solid dominance	unilocular	none	none	none	none	Smooth	Thin wall	none	Escherichia coli	39.541	21.223	no	no	no	6.69423	75.7706	0.95046
male	66	normal	right	single	5	Cystic	unilocular	none	none	none	none	Smooth	Thin wall	none	Stenotrophomonas maltophilia	40	60	no	no	no	1.89	6.1	0.06
male	39	fibrosis	right	single	12.9	Solid	unilocular	none	none	yes	yes	Smooth	Thin wall	none	Escherichia coli	40	10	yes	no	no	7.92	186.3	5
male	50	normal	right	single	6.7	Miscibility	unilocular	none	none	yes	yes	Smooth	Thin wall	none	Pseudomonas aeruginosa	40	10	yes	no	no	14.23	92.27	0.763
female	67	normal	both	single	5.7	Miscibility	unilocular	none	none	none	yes	Smooth	Thin wall	none	Pseudomonas aeruginosa	39.231	12.665	no	no	no	12.32	141.6	9.75
male	50	fibrosis	both	two	3.2	Miscibility	multilocular	none	none	none	none	Smooth	Thin wall	none	Stenotrophomonas maltophilia	38	1	yes	no	no	4.27	75.1	0.373
female	50	normal	right	single	6.6	Miscibility	unilocular	none	none	yes	yes	Smooth	Thin wall	none	Stenotrophomonas maltophilia	39.718	14.16	no	no	no	5.35802	53.2553	0.22845
male	53	normal	both	three or more	10.3	Miscibility	unilocular	none	none	yes	none	Smooth	Thin wall	none	Escherichia coli	40	30	yes	no	no	6.93	106.736	1.50847
female	46	normal	right	single	7.8	Miscibility	unilocular	none	none	yes	yes	Smooth	Thin wall	none	Pseudomonas aeruginosa	39	10	no	no	no	12.08	145.7	0.094
male	42	normal	both	single	7.2	Miscibility	unilocular	none	none	none	none	Smooth	Thin wall	none	Escherichia coli	40.5	20	no	no	no	2.81	29.1	0.305
female	51	normal	right	single	5.5	Miscibility	unilocular	none	none	none	none	Smooth	Thin wall	none	Pseudomonas aeruginosa	40	20	no	no	no	1.09	1110.11	1.64697
male	51	normal	both	single	5.6	Miscibility	unilocular	none	none	none	none	Smooth	Thin wall	none	Escherichia coli	39	20	no	no	no	3.33	58.4119	0.381463
male	63	normal	both	three or more	9.8	Solid dominance	unilocular	none	none	none	none	Smooth	Thin wall	none	Pseudomonas aeruginosa	39.4	10	no	no	no	13.81	153.223	4.15393
male	81	normal	right	single	10.6	Miscibility	multilocular	none	none	yes	yes	Smooth	Thick wall	none	Escherichia coli	39.4895	9.78667	yes	no	no	13.43	126.7	48.6
male	28	normal	left	single	2.9	Solid	unilocular	none	none	none	none	Smooth	Immural	none	Pseudomonas aeruginosa	39.303	19.1283	no	no	no	4.6242	47.1416	0.228384
male	55	normal	right	single	6.5	Cystic dominance	unilocular	none	none	none	yes	Smooth	Thick wall	none	Escherichia coli	39.4	14	no	no	no	9.42	75.3415	0.11
male	52	fibrosis	right	single	11.5	Cystic dominance	multilocular	none	yes	none	none	Smooth	Thick wall	none	Stenotrophomonas maltophilia	39	30	no	no	no	5.45	95.4559	0.87528
female	52	fibrosis	right	single	2.8	Solid dominance	unilocular	none	none	none	none	Smooth	Immural	none	Klebsiella pneumonia	39.377	18.705	no	no	no	4.4354	48.3772	0.360678
female	64	normal	right	single	2.3	Cystic dominance	unilocular	none	none	none	none	Smooth	Thick wall	none	Stenotrophomonas maltophilia	39.082	11.2	no	no	no	10.3888	97.3511	3.2604
male	78	fibrosis	right	single	5	Cystic dominance	multilocular	none	yes	none	none	Smooth	Thick wall	yes	Stenotrophomonas maltophilia	38	21	no	no	no	3.65	78.69	0.406
female	29	normal	left	single	4.6	Cystic dominance	unilocular	none	yes	none	yes	Smooth	Thick wall	none	Stenotrophomonas maltophilia	39	15	no	no	no	3.48	27.77	0.19
male	63	normal	right	single	8.7	Cystic	multilocular	none	none	none	none	Smooth	Thick wall	yes	Escherichia coli	39.9	7	yes	no	no	14.18	130.6	0.554
male	59	normal	right	single	4.3	Solid dominance	unilocular	none	none	none	yes	Smooth	Thick wall	yes	Escherichia coli	39.329	18.1	no	no	no	4.78245	51.9055	0.344394
male	50	fatty liver	right	single	8.1	Cystic dominance	multilocular	none	none	none	none	Smooth	Thick wall	yes	Escherichia coli	39.4763	11.4	no	no	no	8.24763	118.248	0.82822
male	41	normal	right	single	12.8	Cystic dominance	multilocular	none	none	none	yes	Smooth	Thick wall	yes	Escherichia coli	39	6	no	no	no	5.5	158.8	11.89
female	70	normal	right	single	3.4	Cystic dominance	unilocular	none	none	none	none	Smooth	Immural	none	Escherichia coli	40.5	22	no	no	no	4.12	14.9	0.71
male	49	normal	both	single	23	Cystic dominance	multilocular	none	none	none	none	Smooth	Thick wall	yes	Burkholderia cepacia	38	2	yes	no	no	4.7	41.6	0.94
male	60	normal	right	single	12.4	Cystic dominance	unilocular	none	none	none	none	Smooth	Thick wall	none	Burkholderia cepacia	39.431	28.365	no	no	no	5.87	93.1	0.372
female	40	normal	right	single	5.9	Cystic dominance	unilocular	none	none	none	yes	Smooth	Thick wall	none	Stenotrophomonas maltophilia	40	14	no	no	no	7.23	15	0.274
male	42	normal	right	single	5.5	Cystic dominance	unilocular	none	none	none	none	Smooth	Thick wall	none	Escherichia coli	40	1440	no	no	no	7.21	32.3	0.11
male	64	fatty liver	right	single	3.4	Cystic dominance	unilocular	none	none	none	none	Smooth	Thick wall	none	Burkholderia cepacia	39.8	30	no	no	no	5.12	65.6099	1.22227
male	40	normal	left	single	8.4	Cystic dominance	unilocular	none	none	none	none	Smooth	Thick wall	none	Escherichia coli	39.5333	9.02	no	no	no	8.53706	105.453	0.91757
male	43	normal	both	three or more	4.3	Solid	none	none	none	none	none	Smooth	Immural	none	Burkholderia cepacia	41	12	yes	no	no	3.98	20.8	0.781
female	56	normal	right	three or more	4.8	Cystic dominance	unilocular	none	none	none	none	Smooth	Thick wall	none	Escherichia coli	39.2	10	yes	no	no	5.22	49.25	0.92248
female	63	normal	left	single	7.9	Cystic dominance	unilocular	none	none	none	none	Smooth	Thick wall	none	Stenotrophomonas maltophilia	39.5	20	no	no	no	1.97	56	0.25
male	43	normal	right	single	4.2	Cystic dominance	unilocular	none	none	none	none	Smooth	Thick wall	none	Klebsiella pneumonia	39.5	30	no	no	no	6.55	21.7	0.074
male	86	normal	both	single	11.1	Cystic dominance	unilocular	none	none	none	none	Smooth	Thick wall	none	Stenotrophomonas maltophilia	39.4	5	no	no	no	6.89	65.4	0.06
male	70	normal	right	single	9	Cystic dominance	unilocular	none	none	none	none	Smooth	Thick wall	none	Klebsiella pneumonia	39.8	7	no	no	no	11.31	89.3719	0.2
male	75	fatty liver	left	single	9.9	Cystic dominance	unilocular	none	none	none	none	Smooth	Thick wall	none	Stenotrophomonas maltophilia	39.3	12	yes	no	no	7.77	88.5	0.235
female	74	normal	right	single	8.3	Cystic dominance	unilocular	none	none	none	none	Smooth	Thick wall	none	Burkholderia cepacia	38.9	25	no	no	no	10.87	96.4	0.076
female	66	fibrosis	right	single	8.3	Cystic dominance	unilocular	none	none	none	yes	Smooth	Thick wall	none	Burkholderia cepacia	39.5	50	no	yes	no	4.49	63.1	0.267
male	31	normal	both	single	8.6	Cystic dominance	multilocular	none	none	none	none	Smooth	Thick wall	yes	Burkholderia cepacia	39	10	no	no	no	7.15	92.8	0.5
female	59	fatty liver	right	single	7.3	Cystic dominance	unilocular	none	none	none	yes	Smooth	Thick wall	none	Burkholderia cepacia	40.7	31	yes	no	no	5.69	60.6431	0.791
female	59	fatty liver	right	single	8	Solid dominance	unilocular	none	none	yes	yes	Irregular or indistinct	Immural	none	Burkholderia cepacia	40.7	31	yes	no	no	5.2	47.4624	0.182
male	61	normal	left	single	4.6	Solid dominance	multilocular	none	none	yes	none	Irregular or indistinct	Thick wall	yes	Morganella morganii	39.15	20.245	no	no	no	5.1424	61.2967	1.40082
male	61	normal	left	single	4.2	Solid	none	none	none	none	none	Irregular or indistinct	Immural	none	Morganella morganii	39.257	15.185	no	no	no	4.6327	51.5059	0.345178
male	67	normal	right	single	3.8	Solid	none	none	none	yes	none	Irregular or indistinct	Immural	none	Morganella morganii	39.111	14.945	no	no	no	10.4198	626.456	6.52738
female	58	normal	left	single	18	Miscibility	multilocular	none	yes	none	yes	Irregular or indistinct	Thick wall	none	Morganella morganii	39	14	no	no	no	3.64	36.8	0.361
male	58	normal	right	single	8.2	Solid dominance	unilocular	none	none	yes	none	Irregular or indistinct	Immural	none	Klebsiella pneumonia	39.227	107.18	no	no	yes	2.92	3793.15	5.74359
male	49	fatty liver	right	single	9.4	Miscibility	unilocular	none	yes	yes	yes	Smooth	Thick wall	none	Klebsiella pneumonia	39.559	10.0067	no	no	no	11.1146	122.825	3.09763
male	53	normal	right	single	8.5	Miscibility	multilocular	none	yes	yes	yes	Smooth	Thick wall	none	Klebsiella pneumonia	40	7	yes	no	no	7.43	20	1.19
male	61	fibrosis	both	three or more	11.1	Miscibility	multilocular	none	yes	yes	yes	Smooth	Thick wall	none	Klebsiella pneumonia	39.202	16.7175	no	no	no	5.58	90.7634	0.15
male	61	fibrosis	both	three or more	8.3	Solid dominance	unilocular	none	none	yes	yes	Smooth	Immural	none	Klebsiella pneumonia	39.6035	26.83	no	no	no	3.43	13.22	0.111
male	67	fatty liver	right	single	6.7	Cystic dominance	unilocular	none	none	none	yes	Irregular or indistinct	Thick wall	none	Klebsiella pneumonia	39	7	no	no	no	8.98	112.569	0.66
male	65	normal	right	single	10	Solid dominance	multilocular	none	none	yes	yes	Smooth	Thick wall	yes	Klebsiella pneumonia	39.25	9.29	no	no	no	11.83	658.377	6.16384
male	62	fatty liver	right	single	7	Miscibility	multilocular	none	none	yes	yes	Irregular or indistinct	Immural	yes	Klebsiella pneumonia	39.817	11.06	no	no	no	7.87442	98.5889	0.97514
female	63	normal	both	three or more	8.5	Miscibility	multilocular	none	none	yes	yes	Smooth	Thick wall	none	Klebsiella pneumonia	39	10	yes	no	no	8.93	117.476	0.158
male	39	normal	right	single	1.9	Solid	none	none	none	yes	none	Irregular or indistinct	Immural	none	Klebsiella pneumonia	39.441	13.84	no	no	no	10.1545	86.7143	2.47924
male	61	normal	left	single	4.2	Solid	none	none	none	none	none	Irregular or indistinct	Immural	none	Klebsiella pneumonia	39.257	15.185	no	no	no	4.6327	51.5059	0.345178
male	71	fatty liver	both	three or more	11.5	Solid dominance	multilocular	none	none	yes	yes	Smooth	Thick wall	yes	Klebsiella pneumonia	39	10	no	no	no	8.53	128.045	2.52
female	19	normal	both	three or more	7.7	Cystic dominance	multilocular	none	none	yes	yes	Smooth	Thick wall	none	Klebsiella pneumonia	39.158	50.04	no	no	no	11.5965	2269.27	15.0423
male	70	normal	both	three or more	3.3	Cystic dominance	unilocular	none	none	none	none	Irregular or indistinct	Thick wall	none	Klebsiella pneumonia	38.5	20	no	no	no	6.56	2.9	0.069
male	63	normal	right	single	4.1	Solid dominance	unilocular	none	none	yes	yes	Irregular or indistinct	Immural	none	Klebsiella pneumonia	39.3	7	yes	no	no	2.58	573.481	3.56823
male	66	fibrosis	right	single	7.6	Cystic dominance	unilocular	none	yes	yes	yes	Smooth	Thick wall	none	Klebsiella pneumonia	39.155	14.88	yes	no	yes	5.65	74.605	2.40016
female	69	fibrosis	left	single	5	Solid	unilocular	none	none	none	yes	Irregular or indistinct	Immural	none	Klebsiella pneumonia	39.464	74.83	no	no	no	2.72	44.88	0.163
male	38	fibrosis	left	three or more	8.2	Solid dominance	unilocular	none	yes	yes	yes	Irregular or indistinct	Thick wall	yes	Klebsiella pneumonia	40	12	no	no	no	7.74	155.6	5.46
female	32	normal	left	two	1.6	Solid	unilocular	none	none	none	none	Irregular or indistinct	Immural	none	Klebsiella pneumonia	39.336	47.8133	no	no	no	7.25	586.268	0.042
male	45	normal	left	single	3.7	Solid	unilocular	none	none	yes	none	Smooth	Immural	none	Klebsiella pneumonia	38.9	7	no	no	no	1.58	10.4	0.121
male	45	normal	left	single	11.2	Miscibility	multilocular	none	none	none	none	Irregular or indistinct	Thick wall	yes	Klebsiella pneumonia	38.9	7	no	no	no	13.5	183	1.61232
male	61	fibrosis	left	single	5	Cystic dominance	unilocular	none	none	yes	none	Irregular or indistinct	Thick wall	none	Klebsiella pneumonia	37	23.57	no	no	yes	2.91	76.394	4.27099
male	61	fibrosis	left	single	5.9	Solid dominance	unilocular	none	none	none	none	Irregular or indistinct	Thick wall	none	Enterobacter cloacae	39.1	35.4	no	no	yes	4.67	33.5	3.17821
male	71	normal	right	single	5.3	Cystic	unilocular	none	yes	none	none	Smooth	Thick wall	yes	Enterobacter cloacae	39.5	15	yes	no	no	9.01991	64.2937	1.45706
male	48	normal	left	single	3.9	Cystic	unilocular	none	none	none	yes	Smooth	Thick wall	none	Enterobacter cloacae	39.5	12	yes	no	no	3.85979	8.78	0.579251
male	48	normal	left	single	1.5	Solid	unilocular	none	none	none	none	Smooth	Immural	none	Klebsiella pneumonia	39.5	12	yes	no	no	3.70188	8.78	1.191
male	63	fatty liver	right	two	6.5	Cystic	unilocular	none	none	none	none	Smooth	Thick wall	none	Enterobacter cloacae	40	7	yes	no	no	7.02939	1.46	2.86831
female	56	normal	right	two	3.3	Cystic dominance	unilocular	yes	yes	yes	none	Irregular or indistinct	Thick wall	none	Klebsiella pneumonia	39.3	8	yes	no	no	7.64354	10.947	4.36396
female	62	normal	both	single	5.8	Miscibility	unilocular	none	none	none	none	Irregular or indistinct	Thick wall	none	Propionibacterium bullosum	40.3	10	yes	yes	no	6.67427	1.69	0.102
female	49	fibrosis	both	three or more	4	Miscibility	unilocular	none	none	none	yes	Irregular or indistinct	Thick wall	none	Klebsiella pneumonia	40	20	no	yes	no	9.36492	0.994	1.82644
female	62	normal	right	single	8.1	Cystic dominance	multilocular	none	yes	none	yes	Irregular or indistinct	Thick wall	yes	Propionibacterium bullosum	39.8	7	yes	no	no	9.3662	8.805	3.21
female	49	normal	right	single	9	Miscibility	multilocular	none	none	none	yes	Irregular or indistinct	Thick wall	yes	Klebsiella pneumonia	40	14	yes	no	no	10.8601	4.026	6.87726
female	49	normal	both	two	6.3	Cystic dominance	unilocular	none	yes	none	yes	Smooth	Thick wall	none	Klebsiella pneumonia	38.7	25	yes	no	no	6.49247	71.0456	0.94597
male	77	normal	right	single	5.3	Cystic dominance	unilocular	none	yes	none	yes	Smooth	Thick wall	none	Propionibacterium bullosum	38.5	9	yes	no	no	9.89685	0.73	2.23123
female	65	normal	right	two	5.6	Cystic dominance	unilocular	none	none	none	yes	Irregular or indistinct	Thick wall	none	Klebsiella pneumonia	38	13	yes	no	no	4.9032	6.065	3.18
female	59	normal	right	single	7.9	Solid dominance	multilocular	none	none	none	yes	Irregular or indistinct	Thick wall	yes	Klebsiella pneumonia	39.6	7	yes	no	no	9.39019	15.429	1.3
female	59	normal	right	single	10.3	Cystic dominance	unilocular	none	none	none	yes	Irregular or indistinct	Thin wall	none	Klebsiella pneumonia	39.6	7	yes	no	no	9.72425	15.429	1.3
male	40	normal	right	single	7.2	Cystic	unilocular	none	yes	none	none	Smooth	Thin wall	none	Klebsiella pneumonia	40	30	no	no	no	5.6802	4.268	8.41511
male	48	fibrosis	right	single	4.8	Cystic dominance	unilocular	none	none	none	none	Smooth	Thick wall	none	Klebsiella pneumonia	39.6	25.54	no	yes	yes	7.9951	13.235	15.83
female	66	normal	right	single	9.8	Cystic	unilocular	none	yes	none	yes	Smooth	Thick wall	none	Klebsiella pneumonia	38.9	5	yes	no	no	7.28183	14.853	1.51
female	82	normal	right	single	8.3	Cystic	unilocular	none	none	none	yes	Smooth	Thick wall	none	Klebsiella pneumonia	39.6	17	no	no	no	5.36452	6.745	0.41
male	39	fatty liver	right	single	6.2	Solid	none	none	none	none	yes	Irregular or indistinct	Immural	none	Klebsiella pneumonia	39.5	3	no	no	no	7.842	107.783	0.71857
male	39	fatty liver	right	single	7	Cystic dominance	unilocular	none	none	none	yes	Irregular or indistinct	Thick wall	none	Klebsiella pneumonia	39.5	3	no	no	no	8.38251	110.813	0.54948
female	56	normal	right	single	6.6	Miscibility	multilocular	none	none	yes	yes	Irregular or indistinct	Immural	yes	Klebsiella pneumonia	39.7977	10.63	no	no	no	7.5261	85.0816	1.17927
male	66	fatty liver	right	single	9.5	Cystic dominance	multilocular	none	none	yes	yes	Irregular or indistinct	Thick wall	yes	Klebsiella pneumonia	39	14	no	yes	no	7.2832	94.9827	4.71265
male	56	normal	left	single	7.7	Cystic	unilocular	none	none	none	none	Irregular or indistinct	Thin wall	none	Klebsiella pneumonia	38	30	yes	no	no	4.77489	0.646	1.0558
male	34	fatty liver	left	two	10.2	Miscibility	multilocular	none	none	none	yes	Smooth	Immural	none	Klebsiella pneumonia	39.174	32.86	yes	no	no	7.59538	115.593	13.9116
